# Supplementary material for: Using environmental DNA method to clarify the distribution of Pampus echinogaster in the East China Sea
Source: Frontiers journal article supplement (doi:10.3389/fmars.2022.992377), 2022-09-16
Supplement: Table_1.XLSX [file Table_1.XLSX]

## Sheet: Sheet1
Table S1 Sampling site information and corresponding eDNA concentrations of Pampus echinogaster
site	longitude	latitude	Bottle.depth	Depth	temperature	Salinity	Chlorophyll	Oxygen	Turbidity	PO4.P	NH4.N	SiO3.Si	NO3	NO2	Y/N?eDNA	Ln(eDNA+1)
S00-1-4.5	122.5	31.6833	27.963	4.5	17.754	32.4415	0.25	3.5454	3.0863	1.05	2.57	18.89	17.73	0.58	N	0
S00-2-3	123	31.8344	40.963	3	18.5674	25.1468	1.62	6.0833	0.4895	0.23	2.67	19.16	16.03	0.85	N	0
S00-2-10	123	31.8344	40.963	10	16.768	31.8712	2.59	5.2532	1.4218	0.23	1.73	11.31	8.72	0.63	N	0
S00-4-3	124	32.1672	46.263	3	15.6516	31.7582	3.41	6.4537	1.0436	0.36	0.92	14.12	7.14	0.88	N	0
S00-4-10	124	32.1672	46.263	10	13.6028	31.9297	1.08	6.0884	1.3206	0.76	0.94	14.86	10.16	1.63	Y	5.81296
S00-5-4	124.485	32.3358	45.563	4	16.1872	32.3037	0.83	6.1799	0.5607	0.85	1.76	16.09	11.35	1.85	N	0
S01-1-3.5	122.698	29.9981	43.263	3.5	20.2259	29.468	1.01	6.3549	1.1035	0.22	1.11	6.2	2.26	0.56	N	0
S01-2-4.5	123.086	30.0003	58.263	4.5	20.7651	32.0447	0.07	5.4511	0.3074	0.12	1.69	5.28	3.8	0.68	N	0
S01-3-3.5	123.486	29.9858	75.363	3.5	20.0329	31.5451	0.82	5.4981	0.3143	0.19	0.72	7.83	3.2	0.39	N	0
S01-4-3.5	123.9	29.9853	63.263	3.5	20.6122	32.4808	1.2	5.5	0.3786	0.16	1.42	6.7	2.15	0.4	N	0
S01-5-3.1	124.3	29.9858	60.263	3.1	20.5618	33.0374	1.49	5.3547	0.3323	0.08	0.87	3.71	0.09	0.06	N	0
S01-6-3.5	124.683	29.9858	64.263	3.5	19.3492	32.9238	1.54	5.3393	0.3716	0.14	1.75	4.08	0.41	0.11	N	0
S01-7-2.1	125.086	30	64.263	2.1	17.498	32.6444	5.47	5.5729	0.3454	0.23	1	9.17	0.6	0.21	N	0
S01-7-10	125.086	30	64.263	10	17.2881	32.6126	5.23	5.2996	0.3274	0.79	0.93	11.59	7.96	0.41	N	0
S01-8-4.5	125.5	30.0003	64.363	4.5	18.1587	32.4696	2.13	6.0577	0.37	0.19	1.66	8.41	0.64	0.05	N	0
S01-9-5	125.9	29.9856	72.163	5	18.9668	32.2292	1.66	5.8506	0.3256	0.15	0.6	6.13	0.01	0.015	Y	5.43
S02-1-4	122.801	29.6169	56.263	4	19.7905	30.4408	2.76	5.6478	0.3618	0.23	0.84	12.25	6.75	0.58	N	0
S02-2-4.2	123.084	29.4672	62.863	4.2	21.0202	32.4904	1.32	5.2913	0.3572	0.13	1.53	3.01	1.54	0.28	Y	6.80553
S02-3-7	123.368	29.3178	76.263	7	19.443	30.5058	3.34	5.6274	0.3317	0.17	0.89	12.45	6.5	0.8	N	0
S02-4-4.2	123.65	29.1672	78.263	4.2	20.7393	31.8565	1.17	5.3839	0.3476	0.16	1.25	9.19	4.88	0.4	N	0
S02-5-4	123.934	29.0172	84.763	4	21.0676	33.3104	1.41	5.3699	0.3358	0.14	0.54	3.21	0.1	0.07	N	0
S02-6-3.6	124.217	28.8708	77.263	3.6	21.7402	33.3559	0.46	5.3473	0.3508	0.05	1.71	1.87	0.07	0.09	N	0
S02-7-3.5	124.486	28.7175	89.263	3.5	21.3211	33.8621	0.84	5.1182	0.3031	0.25	0.85	2.94	0.2	0.36	Y	5.38964
S02-8-4.5	124.785	28.5836	92.363	4.5	21.3679	33.811	0.48	5.2513	0.098	0.07	1.13	2.18	0.07	0.015	N	0
S03-1-4	122.283	28.6186	49.263	4	19.8517	28.864	1.71	5.8044	0.3972	0.36	1.67	21.4	13.76	1.28	N	0
S03-2-3.6	122.569	28.4672	74.263	3.6	19.9359	29.1731	2.02	5.847	0.3546	0.26	1.36	20.33	11.29	1.14	Y	6.43746
S03-3-3.8	122.869	28.3011	81.263	3.8	21.6009	32.6361	0.62	5.4203	0.3557	0.06	1.57	1.68	1.22	0.27	Y	6.58102
S03-4-4.5	123.169	28.1517	86.263	4.5	22.6215	33.5722	0.58	5.2779	0.4054	0.11	1.4	1.5	0.13	0.12	Y	7.61478
S03-5-4.5	123.469	28	88.463	4.5	23.7617	34.1814	0.29	4.8781	0.3355	0.03	1.57	1.91	1.29	0.11	N	0
S03-6-3.2	123.783	27.8344	91.863	3.2	22.6678	34.0332	0.2	4.9162	0.3501	0.32	0.33	1.54	0.65	0.015	Y	6.15104
S04-1-3	121.618	27.8003	35.063	3	19.866	29.7796	0.39	6.4849	0.3785	0.11	1.55	1.71	2.59	0.34	Y	6.35606
S04-2-3	121.886	27.6333	73.063	3	24.1708	34.3534	0.09	4.7621	0.1057	0.06	3.45	2.71	0.15	0.04	N	0
S04-3-4.5	122.167	27.45	93.263	4.5	25.0284	34.5408	0.01	4.67	0.1045	0.2	0.47	2.82	0.2	0.015	Y	5.81173
S04-4-3	122.419	27.2689	88.763	3	25.2431	34.5103	0.21	4.6513	0.1597	0.11	1.36	26.71	0.18	0.1	Y	6.32994
S04-5-3.5	122.701	27.0856	108.763	3.5	24.6986	34.4974	0.1	4.6984	0.0926	0.38	2.09	3.71	0.11	0.3	Y	5.74631
S05-1-3	120.934	27	47.263	3	22.5307	34.1883	6.42	4.171	5.5191	0.37	1.32	10.46	2.77	0.68	Y	5.81307
S05-2-3	121.233	26.8172	74.263	3	21.053	31.1079	9.24	6.0036	0.3845	0.32	0.82	17.56	7.58	2.61	Y	6.44907
S05-3-3.5	121.519	26.6186	84.263	3.5	24.6009	34.5589	0.15	4.6792	0.3836	0.19	0.62	2.99	0.25	0.52	Y	6.5588
S05-5-2.5	122.118	26.2683	105.663	2.5	25.206	34.4915	0.08	4.6836	0.3207	0.14	0.87	2.92	0.23	0.13	N	0
S05-6-4.5	122.417	26.0681	113.663	4.5	25.1621	34.4902	0.11	4.65	0.1148	0.17	0.94	3.18	0.22	0.14	N	0
S12-1-3.6	125.55	29.5692	94.763	3.6	19.1988	32.5075	0.79	5.7922	0.2977	0.08	0.68	5.86	0.25	0.08	N	0
S12-2-5	125.169	29.0672	87.363	5	19.5348	32.5998	0.45	5.712	0.3448	0.07	3.07	5.2	0.2	0.015	Y	6.37866
S23-1-3	124.269	28.2025	101.263	3	21.6854	33.4112	0.12	5.0774	0.0956	0.04	1.52	1.92	0.72	0.44	N	0
S34-1-3.5	123.185	27.4517	95.263	3.5	24.7458	34.5406	0.03	4.6922	0.3137	0.15	2.05	2.65	0.06	0.015	N	0
S45-1-3.7	122.384	26.6686	104.463	3.7	25.4535	34.5655	0.12	4.6071	0.2287	0.12	0.8	1.25	0.39	1.54	N	0
S00-1-26	122.5	31.6833	27.963	26	17.8162	33.2828	0.86	3.4928	30.2057	1.12	1.83	15.16	12.53	0.35	N	0
S00-3-20	123.501	31.9858	43.663	20	14.5648	31.2804	2.64	5.7776	2.0427	0.48	1.02	13.2	11.7	1.22	Y	5.90023
S00-5-20	124.485	32.3358	45.563	20	13.0573	32.3245	0.58	5.9708	2.5427	0.92	1.3	16.34	10.86	1.64	Y	6.79041
S01-1-25	122.698	29.9981	43.263	25	19.0195	32.4343	2.71	3.8828	2.497	0.47	0.95	26.86	3.83	2.34	Y	5.87949
S01-2-30	123.086	30.0003	58.263	30	19.5904	34.4351	0.58	3.2555	2.9011	0.48	0.71	6.55	7.97	0.44	N	0
S01-3-28	123.486	29.9858	75.363	28	20.5693	33.8804	1.17	3.7943	0.3065	0.39	0.67	7.75	5.81	0.65	N	0
S01-4-15	123.9	29.9853	63.263	15	20.5218	32.9564	1.81	5.3702	0.3652	0.09	1.04	4.29	0.36	0.14	N	0
S01-4-30	123.9	29.9853	63.263	30	20.5476	33.528	1.3	5.0825	0.3511	0.08	0.89	4.29	1.06	0.3	N	0
S01-5-21	124.3	29.9858	60.263	21	20.2712	33.3026	1.58	5.1457	0.3844	0.04	0.67	3.65	0.21	0.18	N	0
S01-6-20	124.683	29.9858	64.263	20	19.4829	33.1462	1.24	5.1285	0.3656	0.35	0.99	6.79	2.85	0.29	N	0
S01-8-15	125.5	30.0003	64.363	15	15.4995	32.6145	5.69	5.9794	0.5863	0.45	1.38	9.31	3.42	0.99	Y	6.16825
S01-9-15	125.9	29.9856	72.163	15	16.5405	32.6971	2.62	6.2692	0.5953	0.17	1.01	9.54	0.7	0.03	N	0
S02-1-20	122.801	29.6169	56.263	20	19.1362	31.0214	0.86	5.1169	0.4033	0.28	0.79	12.27	7.36	0.61	Y	4.68774
S02-2-20	123.084	29.4672	62.863	20	21.6791	33.7703	1.77	4.7032	0.3339	0.15	1.03	4.32	1.83	0.61	N	0
S02-3-20	123.368	29.3178	76.263	20	21.011	33.2968	0.44	4.6595	0.1988	0.33	0.84	6.13	3.58	0.78	Y	6.24347
S02-4-25	123.65	29.1672	78.263	25	21.0201	33.4242	2.74	4.8051	0.305	0.15	0.88	2.8	0.83	0.38	N	0
S02-5-18	123.934	29.0172	84.763	18	20.6412	33.836	0.76	5.0547	0.117	0.07	0.6	3.04	0.11	0.23	Y	6.74602
S02-6-25	124.217	28.8708	77.263	25	21.64	33.6039	0.78	5.0654	0.3648	0.07	0.98	2.26	0.72	0.37	N	0
S02-7-20	124.486	28.7175	89.263	20	21.3	33.8638	0.88	5.1321	0.3227	0.13	0.8	3.11	0.2	0.16	N	0
S02-8-30	124.785	28.5836	92.363	30	21.1366	34.2607	0.27	4.9655	0.2173	0.14	0.95	2.12	0.01	0.015	N	0
S03-1-20	122.283	28.6186	49.263	20	19.0294	31.6602	0.19	3.9306	0.954	1.53	1.41	19.38	13.82	1.5	Y	5.55705
S03-2-20	122.569	28.4672	74.263	20	22.7936	33.9283	1.91	4.9774	0.3309	0.21	1.02	1.98	0.2	0.14	Y	6.91221
S03-3-30	122.869	28.3011	81.263	30	23.4447	34.411	0.73	4.4275	0.3318	0.25	1.14	4.19	1.56	1.53	N	0
S03-4-30	123.169	28.1517	86.263	30	23.4244	34.4495	0.63	4.5887	0.4211	0.15	0.99	3.22	0.12	0.88	Y	5.7003
S03-5-20	123.469	28	88.463	20	23.2738	34.412	0.36	4.8611	0.4068	0.07	0.89	2.34	0.05	0.28	N	0
S03-6-30	123.783	27.8344	91.863	30	22.6409	34.1516	0.24	4.803	0.1278	0.24	0.31	1.8	0.06	0.25	N	0
S04-1-20	121.618	27.8003	35.063	20	20.0533	32.1478	0.25	4.371	2.828	0.36	1.24	9.23	2.85	1.91	N	0
S04-1-30	121.618	27.8003	35.063	30	20.9911	33.6639	0.54	3.9959	21.8786	0.15	1.01	18.4	4.94	0.66	N	0
S04-2-30	121.886	27.6333	73.063	30	21.9871	34.1566	0.56	4.4885	1.1167	0.28	1.22	5.08	0.08	2.5	Y	6.49122
S04-3-30	122.167	27.45	93.263	30	23.9905	34.548	0.06	4.5542	0.453	0.19	0.39	2.92	0.13	0.31	Y	5.74195
S04-4-30	122.419	27.2689	88.763	30	24.5477	34.5077	0.05	4.5272	0.3858	0.21	1.11	3.15	0.78	0.77	N	0
S04-5-30	122.701	27.0856	108.763	30	24.3831	34.5216	0.22	4.6354	0.1334	0.3	1.97	3.45	0.36	0.45	Y	6.00266
S05-1-30	120.934	27	47.263	30	20.737	29.492	0.17	7.0986	0.7776	0.27	0.69	5.83	2.1	1.05	N	0
S05-2-16	121.233	26.8172	74.263	16	23.0846	34.2799	0.83	4.2383	2.5829	0.19	0.89	5.9	3.01	0.89	N	0
S05-2-30	121.233	26.8172	74.263	30	23.0003	34.229	0.17	4.2202	1.592	0.27	0.69	5.82	2.1	1.05	Y	5.68089
S05-3-22	121.519	26.6186	84.263	22	24.2178	34.5745	0.16	4.5042	1.3592	0.29	0.64	3.13	0.98	0.97	N	0
S05-5-30	122.118	26.2683	105.663	30	24.7567	34.4966	0.19	4.6212	0.338	0.18	1.04	2.96	0.25	0.3	N	0
S05-6-30	122.417	26.0681	113.663	30	24.8979	34.4742	0.2	4.6319	0.3796	0.14	0.75	3.23	0.14	0.15	N	0
S12-1-20	125.55	29.5692	94.763	20	17.9849	32.8379	0.78	5.4717	0.3206	0.14	0.62	7.62	1.98	0.29	N	0
S12-2-30	125.169	29.0672	87.363	30	19.0072	32.9786	0.59	5.5533	0.3269	0.1	1.29	5.23	0.01	0.015	N	0
S23-1-30	124.269	28.2025	101.263	30	21.9157	34.2364	0.26	4.69	0.1745	0.03	0.6	2.86	0.23	0.99	N	0
S34-1-30	123.185	27.4517	95.263	30	24.3949	34.546	0.14	4.6699	0.379	0.14	0.99	2.85	0.01	0.015	N	0
S45-1-30	122.384	26.6686	104.463	30	23.3307	34.5921	0.32	4.5379	0.311	0.23	0.76	3.5	0.32	0.94	Y	5.95648
S00-2-34	123	31.8344	40.963	34	16.7251	31.8897	0.86	5.261	3.1891	0.27	1.38	11.15	6.84	0.63	N	0
S00-3-39.2	123.501	31.9858	43.663	39.2	14.6067	31.2982	0.84	5.796	4.7036	0.49	0.95	13.36	12	1.17	N	0
S00-4-41	124	32.1672	46.263	41	13.374	32.0058	0.6	6.0335	9.8912	0.77	0.9	15.1	11.51	1.27	Y	6.92221
S00-5-39.5	124.485	32.3358	45.563	39.5	13.0679	32.3266	0.98	5.9526	8.2522	0.66	0.96	15.64	7.24	2.43	Y	5.1114
S01-1-35	122.698	29.9981	43.263	35	18.7973	33.4918	0.39	3.0699	13.0539	0.53	0.93	26.86	3.67	2.47	N	0
S01-2-48	123.086	30.0003	58.263	48	19.5971	34.467	0.04	3.2122	5.7748	0.87	0.71	7.04	9.44	0.2	N	0
S01-3-40	123.486	29.9858	75.363	40	19.2541	34.4462	0.23	3.2959	2.4784	0.92	0.92	15.84	9.62	0.23	N	0
S01-5-48.6	124.3	29.9858	60.263	48.6	20.2951	34.2197	0.3	4.0208	3.3916	0.35	0.73	9.75	0.98	1.22	N	0
S01-6-40	124.683	29.9858	64.263	40	17.7486	33.647	0.15	4.0028	1.6641	0.75	0.75	11.16	7.91	0.31	Y	5.48111
S01-9-50	125.9	29.9856	72.163	50	14.7257	33.6628	0.08	4.7897	0.84	0.76	1.12	10.08	8.82	0.34	N	0
S02-1-45	122.801	29.6169	56.263	45	19.1259	34.2722	0.23	2.8316	10.1891	1.01	0.81	18.09	11.84	0.17	Y	6.87473
S02-2-40	123.084	29.4672	62.863	40	19.6962	34.5133	0.23	3.4046	3.1768	0.76	0.79	14.53	8.42	0.23	N	0
S02-3-50	123.368	29.3178	76.263	50	19.8809	34.4857	0.2	3.4702	3.9171	0.79	0.76	14.2	7.52	0.21	Y	5.22735
S02-4-50	123.65	29.1672	78.263	50	20.3063	34.3863	0.22	3.6454	1.81	0.61	0.59	51.17	6.24	0.17	N	0
S02-5-50	123.934	29.0172	84.763	50	20.0558	34.3049	0.2	3.8723	3.4334	0.51	0.72	6.1	6.5	0.22	Y	5.62932
S02-6-50	124.217	28.8708	77.263	50	19.8957	34.3501	0.01	3.7094	2.0476	1.15	0.74	13.21	7.22	0.25	Y	6.53527
S02-7-40	124.486	28.7175	89.263	40	21.1902	34.109	0.98	4.5272	0.2339	0.22	0.88	3.56	2.46	0.59	Y	8.92991
S02-8-50	124.785	28.5836	92.363	50	21.124	34.3499	0.02	4.7184	0.1066	0.06	0.84	2.26	0.29	0.4	Y	6.64922
S03-1-39	122.283	28.6186	49.263	39	19.6018	34.4907	0.17	3.1177	7.3475	1.92	0.88	17.68	10.61	0.51	Y	10.4602
S03-2-40	122.569	28.4672	74.263	40	22.7918	34.3358	0.43	4.3919	0.3997	0.31	0.78	5.51	0.69	1.87	Y	6.06475
S03-4-50	123.169	28.1517	86.263	50	21.8271	34.1147	0.35	4.2998	0.5737	0.27	0.79	5.59	0.87	1.69	N	0
S03-5-40	123.469	28	88.463	40	23.1549	34.4532	0.79	4.7593	0.3717	0.08	0.98	2.73	0.14	0.15	N	0
S03-6-50	123.783	27.8344	91.863	50	22.6937	34.3212	0.16	4.6769	0.0868	0.21	0.26	2.28	0.04	0.33	N	0
S04-2-50	121.886	27.6333	73.063	50	20.4873	34.3859	0.1	3.9536	2.0919	0.87	0.61	11.82	8.47	0.51	N	0
S04-3-48	122.167	27.45	93.263	48	23.3754	34.4434	0.39	4.5044	0.3826	0.3	0.33	5.11	0.09	1.85	Y	5.48869
S04-4-46	122.419	27.2689	88.763	46	24.1302	34.513	0.19	4.4521	0.4376	0.23	0.72	2.98	1.21	1.23	N	0
S04-5-50	122.701	27.0856	108.763	50	23.5858	34.5337	0.23	4.6117	0.24	0.33	1.8	3.08	0.7	0.47	N	0
S05-1-50	120.934	27	47.263	50	20.9765	31.4246	0.17	5.8321	0.3612	0.29	0.6	5.79	2.04	0.92	N	0
S05-3-50	121.519	26.6186	84.263	50	24.1508	34.5709	0.12	4.4802	2.602	0.28	0.56	3.17	1.07	1.02	N	0
S05-6-45	122.417	26.0681	113.663	45	22.8688	34.5598	0.23	4.3756	0.347	0.51	0.88	4.89	2.75	1.06	N	0
S12-1-50	125.55	29.5692	94.763	50	17.5679	33.6091	0.03	4.2849	0.5835	0.71	0.88	10.5	8.34	0.16	N	0
S12-2-50	125.169	29.0672	87.363	50	18.5048	33.9254	0.09	4.2205	0.297	0.47	0.63	8.58	7.07	0.22	N	0
S23-1-50	124.269	28.2025	101.263	50	20.8298	33.984	0.19	4.9018	0.0739	0.13	0.37	2.21	0.54	0.31	Y	6.53628
S34-1-50	123.185	27.4517	95.263	50	23.9275	34.5227	0.09	4.4694	0.3654	0.26	0.5	3.31	0.02	0.34	Y	6.55477
S45-1-50	122.384	26.6686	104.463	50	20.6716	34.635	0.11	4.1638	0.2605	0.6	0.92	5.87	2.49	2.43	N	0
S01-3-60	123.486	29.9858	75.363	60	19.2411	34.4491	0.33	3.2902	6.0812	0.96	0.79	15.85	9.79	0.17	N	0
S01-4-51	123.9	29.9853	63.263	51	20.0818	34.2902	0.32	3.8287	2.2982	0.89	0.76	12.4	6.28	0.29	Y	6.14015
S01-6-55	124.683	29.9858	64.263	55	17.6374	33.6388	0.17	3.9875	3.3643	0.88	0.82	12.71	8.04	0.3	Y	6.05268
S01-7-52	125.086	30	64.263	52	15.9403	33.0385	0.28	4.5294	2.976	0.73	0.82	11.66	7.93	0.41	N	0
S01-8-57	125.5	30.0003	64.363	57	14.7846	33.316	0.22	4.8309	2.1591	0.63	0.59	10.07	9.04	0.34	N	0
S01-9-68.2	125.9	29.9856	72.163	68.2	14.7917	33.6912	0.09	4.7603	1.2788	0.74	0.59	9.59	8.89	0.33	Y	6.27537
S02-2-56.9	123.084	29.4672	62.863	56.9	19.6928	34.5156	0.28	3.4092	6.5733	0.79	0.73	14.8	8.54	0.19	Y	5.42296
S02-3-65	123.368	29.3178	76.263	65	19.8713	34.4878	0.24	3.4748	6.2349	0.81	0.91	14.3	7.66	0.21	N	0
S02-4-65	123.65	29.1672	78.263	65	20.2115	34.4043	0.21	3.6129	4.5601	0.75	0.66	13.46	6.58	0.54	N	0
S02-6-66	124.217	28.8708	77.263	66	19.8671	34.3468	0.08	3.7007	2.4188	1.28	0.74	13.14	7.32	0.25	Y	5.44416
S02-7-60	124.486	28.7175	89.263	60	19.5677	34.5361	0.25	3.633	1.5323	0.86	0.97	9.2	4.97	0.38	Y	5.95967
S02-8-70	124.785	28.5836	92.363	70	19.3542	34.6157	0.01	3.5113	1.3386	0.55	0.61	11.91	7.67	0.81	N	0
S03-2-62	122.569	28.4672	74.263	62	18.8282	34.5938	0.23	3.7759	3.2276	0.93	0.84	13.56	7.4	0.87	N	0
S03-3-55	122.869	28.3011	81.263	55	22.6695	34.2958	0.57	4.4424	0.3657	0.26	0.87	4.24	1.96	1.57	N	0
S03-5-60	123.469	28	88.463	60	22.7909	34.4461	0.4	4.4285	0.3383	0.25	0.88	3.5	1.29	0.8	N	0
S03-6-70	123.783	27.8344	91.863	70	22.3973	34.4142	0.09	4.3817	0.3175	0.38	0.45	3.74	1.34	0.77	Y	5.89759
S04-2-68	121.886	27.6333	73.063	68	18.771	34.6257	0.08	3.8327	3.9011	0.95	0.77	12.29	8.9	0.43	N	0
S04-5-70	122.701	27.0856	108.763	70	19.187	34.7455	0.06	3.9159	0.4669	1.39	1.28	9.07	6.82	0.95	N	0
S05-1-64	120.934	27	47.263	64	22.5439	34.204	0.2	4.173	4.537	0.31	0.69	5.69	2.08	0.92	Y	5.72153
S05-2-64	121.233	26.8172	74.263	64	23.0846	34.2799	0.2	4.2383	2.5829	0.31	0.69	5.69	2.08	0.92	N	0
S05-5-58	122.118	26.2683	105.663	58	22.0391	34.6434	0.38	4.4139	0.2939	0.76	0.67	8.53	5.9	0.78	N	0
S23-1-70	124.269	28.2025	101.263	70	19.3764	34.5354	0.06	3.756	0.8512	0.46	0.61	5.26	3.04	0.3	Y	6.31001
S34-1-70	123.185	27.4517	95.263	70	23.2678	34.5238	0.08	4.5337	0.2941	0.33	0.34	3.68	0.64	0.58	N	0
S02-5-74	123.934	29.0172	84.763	74	20.0672	34.3059	0.31	3.8719	4.6377	0.55	0.66	5.95	6.4	0.28	Y	5.98567
S02-7-78	124.486	28.7175	89.263	78	19.5186	34.5261	0.15	3.6294	2.6925	1.15	1.12	12.25	7.56	0.23	Y	5.63103
S02-8-86	124.785	28.5836	92.363	86	19.3305	34.6228	0.08	3.5049	1.5658	0.8	1	15.47	10.41	0.33	N	0
S03-3-75	122.869	28.3011	81.263	75	18.9028	34.5868	0.24	3.7816	2.6016	1.2	0.77	14.63	8.13	0.35	Y	5.71201
S03-4-78	123.169	28.1517	86.263	78	21.0348	34.5782	0.24	4.0142	1.8157	0.56	0.62	9.75	5.03	0.43	Y	6.83762
S03-5-80.2	123.469	28	88.463	80.2	20.0608	34.6297	0.15	3.8489	1.8281	1.07	0.99	10.84	6.53	0.28	N	0
S03-6-86	123.783	27.8344	91.863	86	19.5652	34.6896	0.08	3.8144	1.6347	0.8	0.68	10.84	7.6	0.38	Y	5.8336
S04-3-80	122.167	27.45	93.263	80	18.9449	34.649	0.11	3.894	1.6156	0.98	0.23	11.24	6.51	0.44	N	0
S04-4-82	122.419	27.2689	88.763	82	18.9306	34.7157	0.14	3.8957	1.1441	1.17	0.7	9.53	6.7	0.54	Y	6.96765
S04-5-104	122.701	27.0856	108.763	104	18.842	34.7328	0.05	3.9047	0.8526	1.48	1.11	9.73	7.39	0.43	N	0
S05-3-73.2	121.519	26.6186	84.263	73.2	24.0895	34.5623	0.16	4.5141	3.4596	0.3	0.96	3.27	1.07	1	N	0
S05-5-75	122.118	26.2683	105.663	75	18.9592	34.6606	0.09	3.9891	0.2997	0.4	0.88	4.5	2.53	0.32	Y	6.51599
S05-5-96	122.118	26.2683	105.663	96	18.6924	34.6669	0.06	3.9647	0.3942	0.93	0.45	10.91	8.57	0.67	Y	5.83172
S05-6-75	122.417	26.0681	113.663	75	17.2538	34.6848	0.04	3.8668	0.2569	1.32	0.89	11.68	8.5	0.26	Y	5.67986
S05-6-104	122.417	26.0681	113.663	104	17.0372	34.6759	0.03	3.845	0.3865	1.37	0.87	12.72	9.22	0.25	N	0
S12-1-75	125.55	29.5692	94.763	75	16.5122	33.6904	0.02	4.328	0.8028	0.93	0.67	12.01	10.87	0.21	N	0
S12-1-90	125.55	29.5692	94.763	90	15.1916	33.8345	0.04	4.5613	1.1195	0.9	0.85	10.49	10.81	0.25	Y	6.53858
S12-2-81	125.169	29.0672	87.363	81	18.381	34.219	0.03	3.6665	1.3082	0.96	0.55	13.82	10.96	0.21	Y	5.5307
S23-1-95	124.269	28.2025	101.263	95	19.1742	34.5844	0.08	3.7153	2.3268	1.05	0.58	13.08	8.4	0.23	N	0
S34-1-90	123.185	27.4517	95.263	90	18.5127	34.6357	0.24	3.8162	0.8782	1.05	0.47	13.19	9.56	0.25	N	0
S45-1-75	122.384	26.6686	104.463	75	20.0481	34.8058	0.07	3.9856	0.3238	0.58	0.99	17.81	5.11	0.19	Y	5.92431
S45-1-99	122.384	26.6686	104.463	99	19.7979	34.7943	0.06	3.9805	0.3965	0.68	1.02	15.56	5.27	0.41	Y	6.54034
